# Supplementary material for: A Meta-Analysis on Teachers’ Growth Mindset
Source: Springer Nature journal article supplement (doi:10.1007/s10648-024-09925-7), 2024-08-08
Supplement: MOESM1 [file 10648_2024_9925_MOESM1_ESM.docx]

**Online Supplement S1: Search in databases**

**Search Terms**

(teacher* OR educator* OR instructor* OR lecturer* OR “university scholar*” OR “university facult*” OR professor*) AND

(“implicit theor*” OR “implicit belief*” OR “entity theor*” OR “entity belief*” OR “incremental theor*” OR  “incremental belief*” OR “mindset*” OR “mind-set*” OR “fixed mindset*” OR “growth mindset*” OR “malleable mindset*” OR “theor* of intelligence” OR “belief* about intelligence” OR “theor* of abilit*” OR “belief* about abilit*”) AND (“self-efficacy” OR “teach* efficacy” OR “teach* self-efficacy” OR “teach* sense of self-efficacy” OR “achievement goal*” OR “personal goal*” OR “achievement goal orientation*” OR “goal structure*” OR “classroom goal structure*” OR “classroom structure*” OR “student* achievement” OR “student* performance” OR “student* test performance” OR “teacher* achievement” OR “teacher* performance” OR “teacher* test performance” OR achievement OR performance)

**Search Strategies for Each Data Base**

1. *Web of Science* (Advanced Search, all search strings: search in “All Fields” [i.e., not only in abstract etc.); documents: search in WoS core collection - editions: all)
2. *PsycINFO*(Advanced Search; all search strings: search in “TX all text” [i.e., not only in abstract etc.] find all my search terms; apply related words/also search within the full text of the articles/apply equivalent subjects)
3. *ProQuest* (Advanced Search; all search strings: search in “anywhere except full text”[[1]](#footnote-1); documents: dissertations/thesis; all languages)

1. Using the option to search “anywhere” instead, yielded 16,993 results, among those many irrelevant ones. [↑](#footnote-ref-1)
