# Supplementary material for: A Meta-Analysis on Teachers’ Growth Mindset
Source: Springer Nature journal article supplement (doi:10.1007/s10648-024-09925-7), 2024-08-08
Supplement: MOESM3 [file 10648_2024_9925_MOESM3_ESM.docx]

**Table S1**

*Characteristics of the Included Studies, Samples, and Measures*

| Study | Publication status | *n* | World region | Educational level | Dimensionality mindset | Referent mindset | Content mindset |
| --- | --- | --- | --- | --- | --- | --- | --- |
| Aldahdouh et al. (2018) | Published | 315 | Europe | Tertiary education | Recoded | Self | Ability |
| Aus et al. (2017) | Published | 86 | Europe | Mixed educational levels | Not recoded | Student | Ability |
| Balzer (2014) | Unpublished | 35 | US/Canada | Secondary education | Recoded | You | Intelligence |
| Barroso (2020) | Unpublished | 59 | US/Canada | Primary education | Not recoded | You | Intelligence |
| Bathgate et al. (2019) | Published | 508 | US/Canada | Tertiary education | Recoded | You | Intelligence |
| Beyaztaş et al. (2017) | Published | 1409 | Asia | Student teachers | Not recoded | You | Intelligence |
| Bostwick et al. (2020) | Published | 91 | Australia | Secondary education | Recoded | Mixed/other | Intelligence |
| Bråten & Olaussen (1998) | Published | 176 | Europe | Student teachers | Not recoded |  | Intelligence |
| Bråten & Strømsø (2004) | Published | 80 | Europe | Student teachers | Not recoded | You | Intelligence |
| Chiarelli (2018) (1) | Unpublished | 12 | US/Canada | Mixed educational levels | Not recoded |  | Intelligence |
| Chiarelli (2018) (2) | Unpublished | 16 | US/Canada | Mixed educational levels | Not recoded |  | Intelligence |
| Christopher (2018) | Unpublished | 321 | US/Canada | Student teachers | Recoded | You | Intelligence |
| Copich (2014) | Unpublished | 71 | US/Canada |  | Recoded | You | Mixed/other |
| Crosswaite & Asbury (2019) | Published | 325 | Europe | Mixed educational levels |  |  | Intelligence |
| Cutumisu (2019a) | Published | 68 | US/Canada | Student teachers | Not recoded | You | Ability |
| Cutumisu (2019b) | Published | 52 | US/Canada | Student teachers | Not recoded | You | Ability |
| Cutumisu & Lou (2023) | Published | 107 | US/Canada | Student teachers | Not recoded | You | Ability |
| Study | Publication status | *n* | World region | Educational level | Dimensionality mindset | Referent mindset | Content mindset |
| Deemer (1999) | Unpublished | 99 | US/Canada | Secondary education | Recoded | You | Intelligence |
| Dresel et al. (2013) | Published | 46 | Europe | Secondary education | Recoded | Student | Ability |
| Fang (2017) | Unpublished | 44 | US/Canada |  | Recoded | You | Intelligence |
| Gero (2013) | Unpublished | 338 | US/Canada | Primary education | Recoded | You | Intelligence |
| Griffin (2008) | Unpublished | 311 | US/Canada | Mixed educational levels | Recoded | You | Intelligence |
| Harrold (2019) | Unpublished | 37 | US/Canada | Primary education | Recoded |  |  |
| Heyder et al. (2019) | Published | 56 | Europe | Primary education | Recoded |  | Mixed/other |
| Kilpatrick (2012) | Unpublished | 70 | US/Canada | Primary education | Not recoded | Teachers | Intelligence |
| Klein (1996) | Unpublished | 18 | US/Canada | Student teachers | Recoded | Mixed/other | Intelligence |
| Lenart (2016) | Unpublished | 276 | US/Canada | Secondary education | Recoded | You | Intelligence |
| Lin et al. (2022) | Published | 1297 | Asia | Mixed educational levels | Recoded |  | Intelligence |
| Leroy et al. (2007) | Published | 298 | Europe | Primary education | Not recoded | Student | Ability |
| Mascret et al. (2015) | Published | 304 | Europe | Secondary education | Not recoded | You | Intelligence |
| Matteucci et al. (2017) | Published | 287 | Europe | Secondary education | Recoded | Mixed/other | Intelligence |
| McLaughlin (2018) | Unpublished | 23 | US/Canada | Student teachers | Recoded | You | Intelligence |
| Midgley et al. (1998) (1) | Published | 94 | US/Canada | Primary education | Recoded | Student | Mixed/other |
| Midgley et al. (1998) (2) | Published | 59 | US/Canada | Secondary education | Recoded | Student | Mixed/other |
| Palazzolo (2016) | Unpublished | 56 | US/Canada | Student teachers | Recoded | You | Intelligence |
| Park et al. (2016) | Published | 58 | US/Canada | Primary Education | Recoded | Mixed/other | Mixed/other |
| Porter et al. (2022) | Published | 47 | US/Canada | Secondary education | Recoded | You | Intelligence |
| Study | Publication status | *n* | World region | Educational level | Dimensionality mindset | Referent mindset | Content mindset |
| Seals (2018) | Unpublished | 25 | US/Canada | Secondary education | Recoded | You | Intelligence |
| Shim et al. (2013) | Published | 209 | US/Canada | Mixed educational levels | Recoded | Student | Intelligence |
| Siebert (2006) | Unpublished | 63 | US/Canada | Secondary education | Recoded | You | Intelligence |
| Sitkovich (2018) | Unpublished | 757 | Europe | Mixed educational levels | Recoded | Student | Ability |
| K. L. Stewart (2018) | Unpublished | 10 | US/Canada | Mixed educational levels | Recoded | You | Mixed/other |
| B. J. Stewart (2018) | Unpublished | 208 | US/Canada |  | Recoded | Student | Intelligence |
| Stockinger et al. (2021) | Published | 785 | Europe | Tertiary education | Not recoded | Mixed/other | Intelligence |
| Thadani et al. (2015) | Published | 86 | US/Canada | Tertiary education | Recoded | Mixed/other | Intelligence |
| Thayer (2020) | Unpublished | 161 | US/Canada | Primary education | Recoded | Student | Intelligence |
| Tao et al. (2021) | Published | 271 | Asia | Secondary education | Recoded | You | Intelligence |
| Wadsworth (2007) | Unpublished | 144 | US/Canada | Secondary education | Recoded | You | Intelligence |
| A. Y. Williams (2012) | Unpublished | 183 | US/Canada | Secondary education | Recoded | Student | Mixed/other |
| C. Williams (2015) | Unpublished | 571 | US/Canada | Secondary education | Recoded | Mixed/other | Mixed/other |
| Yeager et al. (2022) | Published | 221 | US/Canada | Secondary education | Recoded | Mixed/other | Mixed/other |
| Yu et al. (2022) | Published | 358 | Europe | Primary education | Recoded | You | Intelligence |

*Note*. Blank cells indicate that no information could be retrieved from the primary studies. Study quality codings and effect sizes can be found in Table S2, which includes numerical information.
