# Supplementary material for: A Meta-Analysis on Teachers’ Growth Mindset
Source: Springer Nature journal article supplement (doi:10.1007/s10648-024-09925-7), 2024-08-08
Supplement: MOESM4 [file 10648_2024_9925_MOESM4_ESM.xlsx]

## Sheet: Sheet1
Authors	Year of Publication	n	Dimensionality (1 = recoded either in study or for meta-analysis; 2 = not recoded, i.e., growth mindset)	Referent (1 = teachers in general (i.e., ("teachers have/teachers are ...") ; 2 = student, 3 = the self (i.e., "I can …); 4 = you; 5 = mixed/other	Content (1 = intelligence; 2 = ability, 3 = mixed/sth else (e.g., talent)	Publication Status (1 = published, 2 = unpublished)	World Region (1 = US/Canada, 2 = Europe, 3 = Asia, 4 = Africa, 5 = Australia, 6 = S-America)	Educational Level (1 = primary education, 2 = secondary education, 3 = tertiary education, 4 = student teachers, 5 = mixed educational levels)	SE	MAp	PAp	PAp_recoded	PAv	PAv_recoded	MAp GS	PAp GS	PAp_GS recoded	Ach. Teacher	Ach. Students	Quality Score
Aldahdouh et al. (2018)	2018	315	1	3	2	1	2	3		.148	-.066	.066	-.059	.059						2
Aus et al. (2017)	2017	86	2	2	2	1	2	5	.03						-.01	-.08	.08			2
Balzer (2014)	2014	35	1	4	1	2	1	2											.104	2
Barroso (2020)	2020	59	2	4	1	2	1	1											.304	1
Bathgate et al. (2019)	2019	508	1	4	1	1	1	3	.04											2
Beyaztaş et al.	2017	1409	2	4	1	1	3	4		.12	.00	-.00								3
Bostwick et al.	2020	91	1	5	1	1	5	2											-.048	2
Bråten & Olaussen (1998)	1998	176	2		1	1	2	4	.06											1
Bråten & Strømsø (2004)	2004	80	2	4	1	1	2	4		.22	-.06	.06	-.11	.11						2
Chiarelli (2018) (1)	2018	12	2		1	2	1	5											.071	2
Chiarelli (2018) (2)	2018	16	2		1	2	1	5											-.131	2
Christopher (2018)	2018	321	1	4	1	2	1	4										.26		1
Copich (2014)	2014	71	1	4	3	2	1											.08		2
Crosswaite & Asbury (2019)	2019	325			1	1	2	5										-.253		3
Cutumisu (2019a)	2019	68	2	4	2	1	1	4										-.03		2
Cutumisu (2019b)	2019	52	2	4	2	1	1	4										.12		0
Cutumisu & Lou (2023)	2023	107	2	4	2	1	1	4										.02		1
Deemer (1999)	1999	99	1	4	1	2	1	2	.21						.19	.02	-.02			2
Dresel et al. (2013)	2013	46	1	2	2	1	2	2	-.14	.14	-.03	.03	.01	-.01						2
Fang (2017)	2017	44	1	4	1	2	1		.334											1
Gero (2013)	2013	338	1	4	1	2	1	1	.163	.160	-.015	.015	-.229	.229						4
Griffin (2008)	2008	311	1	4	1	2	1	5	.08											2
Harrold (2019)	2019	37	1			2	1	1										.082		3
Heyder et al. (2019)	2019	56	1		3	1	2	1											-.102	3
Kilpatrick (2012)	2012	70	2	1	1	2	1	1	.38											1
Klein (1996)	1996	18	1	5	1	2	1	4	.57											2
Lenart (2016)	2016	276	1	4	1	2	1	2	.170											2
Lin et al. (2022)	2022	1297	1		1	1	3	5	.193											2
Leroy et al. (2007)	2007	298	2	2	2	1	2	1	.22											3
Mascret et al. (2017)	2017	304	2	4	1	1	2	2							-.054	.064	-.064			2
Matteucci et al. (2017)	2017	287	1	5	1	1	2	2	.11						.17					2
McLaughlin (2018)	2018	23	1	4	1	2	1	4	-.01											2
Midgley et al. (1) (1988)	1998	94	1	2	3	1	1	1	.15											2
Midgley et al. (2) (1988)	1988	59	1	2	3	1	1	2	.41											2
Palazzolo (2016)	2016	56	1	4	1	2	1	4	.479											2
Park et al. (2016)	2016	58	1	5	3	1	1	1							.23	-.30	.30	-.15	.084	2
Porter et al.	2022	47	1	4	1	1	1	2											-.152	3
Seals (2018)	2018	25	1	4	1	2	1	2	.39											2
Shim et al. (2013)	2013	209	1	2	1	1	1	5		.23	-.13	.13	.01	-.01	.13	-.04	.04			2
Siebert (2006)	2006	63	1	4	1	2	1	2	.468											3
Sitkovich (2018)	2018	757	1	2	2	2	2	5	.114						.228					NA
K. L. Stewart (2018)	2018	10	1	4	3	2	1	5	.353											2
B. J. Stewart (2018)	2018	208	1	2	1	2	1		.23											2
Stockinger et al. (2021)	2021	785	2	5	1	1	2	3		.16	-.05	.05	-.03	.03						3
Thadani et al. (2015)	2015	86	1	5	1	1	1	3	.213											2
Thayer	2020	161	1	2	1	2	1	1	.265										-.065	1
Tao et al. (2021)	2021	271	1	4	1	1	3	2	.05											2
Wadsworth	2007	144	1	4	1	2	1	2							.207	.033	-.033			2
A. Y. Williams (2012)	2012	183	1	2	3	2	1	2	.218											3
C. Williams (2015)	2015	571	1	5	3	2	1	2	.267											3
Yeager et al. (2022)	2022	221	1	5	3	1	1	2											-.1049	2
Yu et al. (2022)	2022	358	1	4	1	1	2	1	.04											4
